# Supplementary material for: The importance of patient compliance in repeated rounds of mass drug administration (MDA) for the elimination of intestinal helminth transmission
Source: PubMed Central journal article supplement (PMC5469187; doi:10.1186/s13071-017-2206-5), 2017-06-12

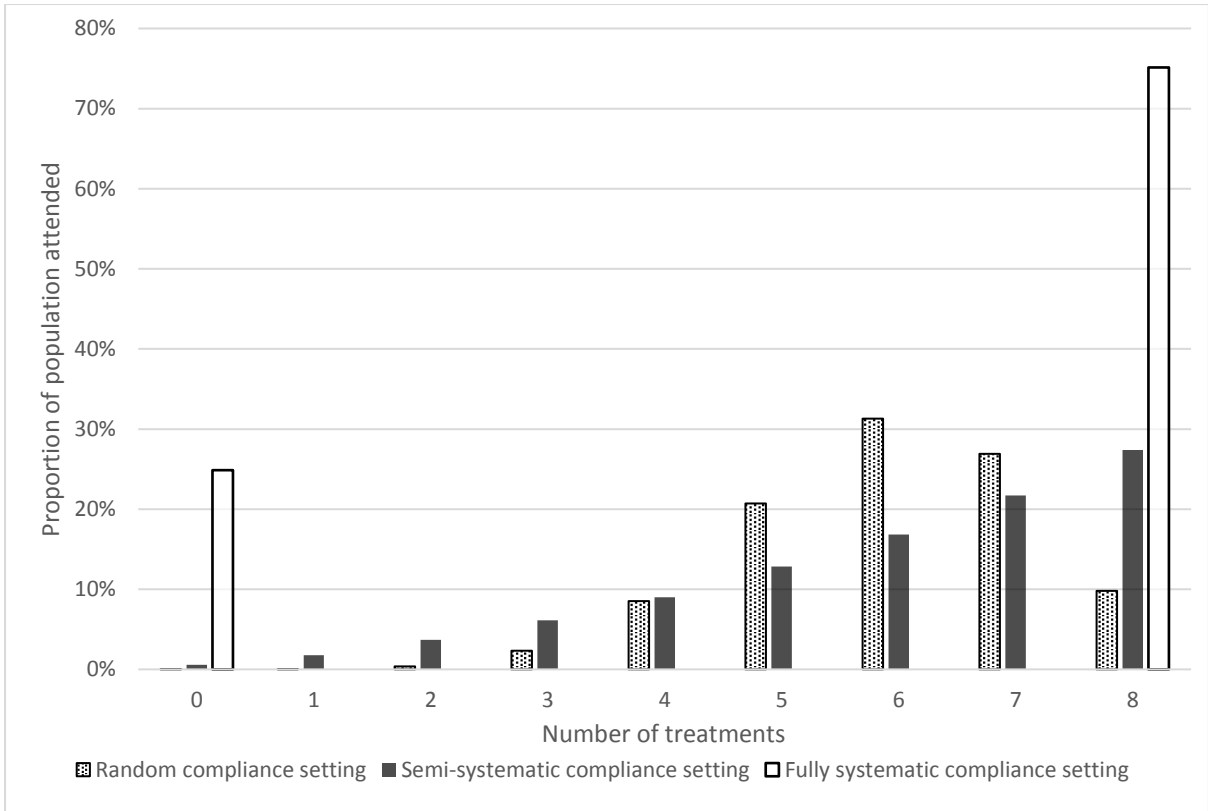

Supplement: 13071_2017_2206_MOESM1_ESM.pdf [file 13071_2017_2206_MOESM1_ESM.pdf]
